# Supplementary material for: Transforming Maasai Landscapes: Land Cover Changes and Their Implications for Pastoralism and Conservation
Source: Research Square preprint supplement (doi:10.21203/rs.3.rs-5911943/v1), 2025-02-03
Supplement: Supplementary file 1 [file 58e38e1162aa8272f5c10528.docx]

**Supplementary Information**

**Table S1:** Cross-tabulation error matrix for 2023 land cover classification in Maasai landscapes.

| **Land cover 2023** | **Water** | **Trees** | **Flooded vegetation** | **Crops** | **Built area** | **Bare ground** | **Rangeland** | **Total** | **User Accuracy** |
| --- | --- | --- | --- | --- | --- | --- | --- | --- | --- |
| Water | 10 | 0 | 0 | 0 | 0 | 0 | 0 | 10 | 100.00 |
| Trees | 0 | 100 | 0 | 0 | 0 | 0 | 4 | 104 | 96.15 |
| Flooded vegetation | 0 | 0 | 10 | 0 | 0 | 0 | 0 | 10 | 100.00 |
| Crops | 0 | 0 | 0 | 30 | 0 | 0 | 1 | 31 | 96.77 |
| Built area | 0 | 0 | 0 | 0 | 20 | 1 | 1 | 22 | 90.91 |
| Bare ground | 0 | 0 | 0 | 1 | 1 | 10 | 0 | 12 | 83.33 |
| Rangeland | 0 | 3 | 0 | 2 | 1 | 0 | 120 | 126 | 95.24 |
| Total | 10 | 103 | 10 | 33 | 22 | 11 | 126 | 300 |  |
| Producer Accuracy | 100.00 | 97.09 | 1.00 | 90.91 | 90.91 | 90.91 | 95.24 |  |  |
| **Overall accuracy** |  |  |  |  |  |  |  | **0.95** |  |
| **Kappa** |  |  |  |  |  |  |  | **0.94** |  |

**Table S2:** Cross-tabulation error matrix for 2017 land cover classification in Maasai landscapes.

| **Land cover 2017** | **Water** | **Trees** | **Flooded vegetation** | **Crops** | **Built area** | **Bare ground** | **Rangeland** | **Total** | **User Accuracy** |
| --- | --- | --- | --- | --- | --- | --- | --- | --- | --- |
| Water | 10 | 0 | 0 | 0 | 0 | 0 | 0 | 10 | 100.00 |
| Trees | 0 | 97 | 0 | 0 | 0 | 0 | 5 | 102 | 95.10 |
| Flooded vegetation | 0 | 0 | 10 | 0 | 0 | 0 | 0 | 10 | 100.00 |
| Crops | 0 | 0 | 0 | 31 | 0 | 0 | 1 | 32 | 96.88 |
| Built area | 0 | 0 | 0 | 0 | 19 | 1 | 1 | 21 | 90.48 |
| Bare ground | 0 | 0 | 0 | 2 | 1 | 10 | 0 | 13 | 76.92 |
| Rangeland | 0 | 4 | 0 | 2 | 1 | 0 | 120 | 127 | 94.49 |
| Total | 10 | 101 | 10 | 35 | 21 | 11 | 127 | 297 |  |
| Producer Accuracy | 100.00 | 96.04 | 1.00 | 88.57 | 90.48 | 90.91 | 94.49 |  |  |
| **Overall accuracy** |  |  |  |  |  |  |  | **0.94** |  |
| **Kappa** |  |  |  |  |  |  |  | **0.93** |  |
